# Supplementary material for: Effect of family history of cancer on postoperative survival in patients with non-small cell lung cancer
Source: PubMed Central journal article supplement — Transl Lung Cancer Res. 2024 Aug 21;13(8):1851–61. doi: 10.21037/tlcr-24-349 (PMC11384475; doi:10.21037/tlcr-24-349), 2024-08-21
Supplement: tlcr-13-08-1851-dss.pdf [file tlcr-13-08-1851-dss.pdf]

## Data Sharing Statement

|                     |                                                                                                                                                    |                                                                                                                   |
|---------------------|----------------------------------------------------------------------------------------------------------------------------------------------------|-------------------------------------------------------------------------------------------------------------------|
| <b>Article Info</b> | <a href="https://dx.doi.org/10.21037/tlcr-24-349">https://dx.doi.org/10.21037/tlcr-24-349</a>                                                      |                                                                                                                   |
| <b>Item</b>         | <b>Question</b>                                                                                                                                    | <b>Authors' Response<br/>(place "-" if not applicable)</b>                                                        |
| 1                   | Would you like to share data collected for your study to others?                                                                                   | Yes.                                                                                                              |
| 2                   | If not, would you like to share the reason for your decision?                                                                                      | -                                                                                                                 |
| 3                   | What data in particular will be shared?                                                                                                            | Baseline characteristics, perioperative outcomes and survival data of patients included in this study.            |
| 4                   | Any other documents will be share? Such as study protocol, statistical analysis plan, informed consent form, clinical study report, analytic code. | Statistical analysis plan, clinical study report, analytic code.                                                  |
| 5                   | When will data availability begin?                                                                                                                 | From the publication date.                                                                                        |
| 6                   | When will data availability end?                                                                                                                   | One year within the publication date.                                                                             |
| 7                   | To whom will you share the data?                                                                                                                   | Thoracic surgeons who are interested in the video-assisted thoracoscopic segmentectomy.                           |
| 8                   | For what type of analysis or purpose?                                                                                                              | For analysis to evaluate the safety and feasibility of uniportal and three-port segmentectomy.                    |
| 9                   | How or where can the data/documents be obtained?                                                                                                   | Emails could be sent to the address below to obtain the shared data:<br>liaotiger_198653@163.com                  |
| 10                  | Any other restrictions?                                                                                                                            | We may consider the potential benefits and risks for each request and then provide the data that could be shared. |
