# Supplementary material for: Effect of family history of cancer on postoperative survival in patients with non-small cell lung cancer
Source: PubMed Central journal article supplement — Transl Lung Cancer Res. 2024 Aug 21;13(8):1851–61. doi: 10.21037/tlcr-24-349 (PMC11384475; doi:10.21037/tlcr-24-349), 2024-08-21
Supplement: tlcr-13-08-1851-supplementary.pdf [file tlcr-13-08-1851-supplementary.pdf]

**Table S1** Multivariable Cox regression analysis in LUAD

| Variables            | OS                  |         | PFS                 |         | LCSS                |         |
|----------------------|---------------------|---------|---------------------|---------|---------------------|---------|
|                      | HR [95% CI]         | P value | HR [95% CI]         | P value | HR [95% CI]         | P value |
| FHC vs. non-FHC      | 1.11 [0.80, 1.54]   | 0.52    | 0.96 [0.75, 1.23]   | 0.72    | 1.23 [0.87, 1.73]   | 0.24    |
| FEV1%                | 0.99 [0.99, 1.00]   | 0.16    | 1.00 [0.99, 1.00]   | 0.35    | 1.00 [0.99, 1.00]   | 0.41    |
| DLCO%                | 0.99 [0.99, 1.00]   | 0.08    | 1.00 [0.99, 1.00]   | 0.21    | 0.99 [0.99, 1.00]   | 0.16    |
| VATS (VATS vs. open) | 0.66 [0.46, 0.94]   | 0.02    | 0.75 [0.56, 1.00]   | 0.054   | 0.62 [0.43, 0.90]   | 0.01    |
| Tumor size           | 1.16 [1.08, 1.25]   | <0.001  | 1.22 [1.16, 1.28]   | <0.001  | 1.16 [1.08, 1.26]   | <0.001  |
| Stage                |                     |         |                     |         |                     |         |
| I                    | Reference           |         | Reference           |         | Reference           |         |
| II                   | 6.54 [4.52, 9.46]   | <0.001  | 6.81 [5.24, 8.86]   | <0.001  | 8.03 [5.35, 12.06]  | <0.001  |
| III                  | 10.25 [7.39, 14.21] | <0.001  | 10.33 [8.19, 13.03] | <0.001  | 12.90 [8.97, 18.54] | <0.001  |
| IV                   | 15.31 [8.56, 27.40] | <0.001  | 12.72 [7.85, 20.63] | <0.001  | 18.10 [9.59, 34.16] | <0.001  |

LUAD, lung adenocarcinoma; OS, overall survival; HR, hazard ratio; CI, confidence interval; PFS, progression-free survival; LCSS, lung cancer-specific survival; FHC, family history of cancer; FEV1, forced expiratory volume in 1 second; DLCO, diffusing capacity of the lungs for carbon monoxide; VATS, video-assisted thoracic surgery.

**Table S2** Multivariable Cox regression analysis in LUSC

| Variables            | OS                  |         | PFS                 |         | LCSS                |         |
|----------------------|---------------------|---------|---------------------|---------|---------------------|---------|
|                      | HR [95% CI]         | P value | HR [95% CI]         | P value | HR [95% CI]         | P value |
| FHC (yes vs. no)     | 2.16 [1.35, 3.44]   | 0.001   | 2.06 [1.34, 3.17]   | 0.001   | 2.32 [1.42, 3.78]   | 0.001   |
| FEV1%                | 1.00 [0.99, 1.01]   | 0.78    | 1.00 [0.99, 1.01]   | 0.64    | 1.00 [0.99, 1.01]   | 0.88    |
| DLCO%                | 0.99 [0.98, 0.99]   | 0.003   | 1.00 [0.99, 1.01]   | 0.51    | 0.99 [0.98, 1.00]   | 0.04    |
| VATS (VATS vs. open) | 1.22 [0.82, 1.82]   | 0.33    | 1.17 [0.81, 1.67]   | 0.41    | 1.22 [0.80, 1.87]   | 0.36    |
| Tumor size           | 1.05 [0.96, 1.15]   | 0.30    | 1.03 [0.94, 1.12]   | 0.59    | 1.05 [0.95, 1.15]   | 0.35    |
| Stage                |                     |         |                     |         |                     |         |
| I                    | Reference           |         | Reference           |         | Reference           |         |
| II                   | 1.45 [0.86, 2.42]   | 0.16    | 1.41 [0.89, 2.22]   | 0.15    | 1.63 [0.92, 2.88]   | 0.09    |
| III                  | 2.84 [1.68, 4.80]   | <0.001  | 2.76 [1.72, 4.44]   | <0.001  | 3.43 [1.94, 6.08]   | <0.001  |
| IV                   | 12.91 [2.60, 64.20] | 0.002   | 10.56 [2.18, 51.20] | 0.003   | 18.13 [3.52, 93.21] | 0.001   |

LUSC, lung squamous cell carcinoma; OS, overall survival; HR, hazard ratio; CI, confidence interval; PFS, progression-free survival; LCSS, lung cancer-specific survival; FHC, family history of cancer; FEV1, forced expiratory volume in 1 second; DLCO, diffusing capacity of the lungs for carbon monoxide; VATS, video-assisted thoracic surgery.
